# Supplementary material
Source: publisher site journal article supplement (https://www.dovepress.com/get_supplementary_file.php?f=406628.docx)
Supplement: Supplementary file 1 [file get_supplementary_file.php]

## Table S1. Approving ethics committees

| Site No. | Names of ethics committees | Reference number |
| --- | --- | --- |
| 001 | Clinical Research Ethics Committee of China-Japan Friendship Hospital | 2018-166-K120 |
| 002 | Medical Ethics Committee of Tongji Medical College of Huazhong University of Science and Technology | [2019] Ethics Review No. (S1038) |
| 003 | Medical Ethics Committee of Union Hospital of Huazhong University of Science and Technology | [2019] Ethics Review No. (S1037) |
| 004 | Medical Science Research Ethics Committee of Peking University First Hospital | (2019) Research No. (288) |
| 005 | Clinical Research Ethics Committee of Renmin Hospital of Wuhan University | WDRY2019-Y047 |
| 006 | Clinical Research Ethics Review Committee of Shanghai Ninth People's Hospital, Shanghai Jiaotong University, School of Medicine | SH9H-2020-C14-2 |
| 008 | Human Research Ethics Committee of the Second Affiliated Hospital of Zhejiang University, School of Medicine | (2020) Ethics Review Medicine No.(139) |
| 010 | Medical Ethics Committee of The First Affiliated Hospital of Guangzhou Medical University | Medical Ethics Review 2019 No. 66 |
| 011 | Medical Ethics Committee of Zhujiang Hospital of Southern Medical University | 2019-YW-012-01 |
| 013 | Medical Ethics Committee of Beijing Chao-Yang Hospital of Capital Medical University | Acceptance No: 2019-10-29-1  No: 2019-Medicine-25 |
| 014 | Medical Ethics Committee of Peking University Third Hospital | (2019) Medical Ethics Review No. (412-01) |
| 015 | Clinical Research Ethics Committee of Beijing Anzhen Hospital | Ethics approval No: (2019) Medicine  Medical Ethics Review No. (27)  Acceptance No: 2019-055D |
| 016 | Medical Ethics Committee of Beijing Shijitan Hospital of Capital Medical University | (2019) Research Ethics Review No. (18) |
| 020 | Ethics Committee of The Chengdu First People's Hospital | 03-Sep-2019 |
| 021 | Ethics Committee of Chongqing People's Hospital | Ethics Review No. S2019-004-01 |
| 022 | Biomedical Research Ethics Committee of Peking University First Hospital | (2019) Research No. (208) |
| 023 | Medical Ethics Committee of Tianjin Medical University General Hospital | IRB2019-149-01 |
| 029 | Clinical Research Ethics Committee of Weifang People's Hospital | 2019-012-01 |
| 030 | Medical Ethics Committee of Beijing Tsinghua Changgeng Hospital | 20024-1-02 |
| 031 | Clinical Research Ethics Committee of Zibo Central Hospital | (2019) Ethics Review No. (005) |
| 032 | Medical Ethics Committee of Shanghai Tongji Hospital | (Tong) Ethics Review No. 2020-030 |
| 035 | Medical Ethics Committee of the Second Affiliated Hospital of Wenzhou Medical University | Medical Ethics Review No. (2020-08) |
| 039 | Ethics Committee of the Second Affiliated Hospital of Suzhou University | JD-LK-2020-018-02 |
| 040 | Ethics Committee of the Affiliated Hospital of Nantong University | 2019-K079 |
| 041 | Ethics Committee Of Beijing Hospital | 2019BJYYEC-213-02 |
| 042 | Medical Ethics Committee of Taizhou Central Hospital (Taizhou University Hospital) | Research Ethics Review No. (2020 06) |
| 043 | Ethics Committee of Gansu People's Hospital | (2019) Ethics Review No. 02 |
| 044 | Clinical Research Ethics Committee of the First Hospital of Hebei Medical University | [2020] Ethics Review No. (213-01) |
| 045 | Ethics Committee of Peking Union Medical College Hospital, Chinese Academy of Medical Sciences | B329 |
| 047 | Ethics Committee of the Affiliated Hospital Of Inner Mongolia Medical University | NO.SY (2020048) |
| 050 | Medical Ethics Committee of NanFang Hospital of Southern Medical University | NFEC-2020-014 |
| 052 | Clinical Research Ethics Committee of the Hebei Petro China Cental Hospital | IRB2020-002-01 |
| 053 | Ethics Committee of Shanghai Minhang Hospital | 2020-Approval No-018-01K |
| 055 | Ethics Committee of the Second Affiliated Hospital of Air Force Military Medical University (Tangdu Hospital of the Fourth Military Medical University) | No. 201911-01 |
| 057 | Human Research Ethics Commitee of the Fourth Affiliated Hospital, College of Medicine , Zhejiang University | S2020004 |
| 059 | Ethics Committee of Hangzhou First People's Hospital | [2020] Ethics Review No. 047-01 |
| 060 | Medical Ethics Committee of Tangshan Gongren Hospital | GRYY-LL-2019-47 |
| 061 | Ethics Committee of Henan Provincial People's Hospital | (2019) Ethics Review No. (79) |
| 062 | Medical Ethics Committee of The First Affiliated Hospital of Suzhou University | (2019) Ethics Review No.118 |
| 063 | Ethical Review Committee of Human Testing, Shanghai General Hospital | Ethics Review No. [2019]45 |
| 067 | Ethical Committee of Tongji Hospital Affiliated to Tongji Medical College, Huazhong University of Science and Technology | [2019] Ethics Review No. (S1101) |
| 069 | Medical Ethics Committee of the Second Hospital of Tianjin Medical University | Research Review No. (KY2019K105) |
| 070 | Medical Ethics Committee of the Second Hospital of Tianjin Medical University | Research Review No. (KY2019K111) |
| 071 | Ethics Committee of Peking Union Medical College Hospital, Chinese Academy of Medical Sciences | B329 |
| 072 | Ethics Committee of Panzhihua Integrated Chinese and Western Medicine Hospital | Ethics Review (Approval) No. 2019-11-001 |
| 073 | Medical Ethics Committee of NanFang Hospital of Southern Medical University | NFEC-2020-037 |
| 074 | Clinical Research Ethics Committee of the Second Affiliated Hospital of Guangzhou Medical University | Y2020-03-01 |
| 075 | Medical Ethics Committee of The Affiliated Hospital of Hangzhou Normal University | 2020 (E2)-KS-001 |
| 077 | Medical Ethics Committee of Beijing Luhe Hospital, Capital Medical University | 2019-LHKY-026-02 |
| 078 | Medical Ethics Committee of Shanghai Dongfang Hospital (Dongfang Affiliated Hospital of Tongji University) | [2019] Ethics Review No. (072) |
| 081 | Medical Ethics Committee of Civic Aviation General Hospital | 2019-Y-D-06 |
| 082 | Medical Ethics Committee of Shandong Provincial Qianfoshan Hospital | YXLL-KY-No. 2019(022) |
| 086 | Ethics Committee of the First Affiliated Hospital of Kunming Medical University | (2020) Ethics Review YL No. 17-1 |
| 087 | Medical Ethics Committee of Jilin Provincial People's Hospital | 2020001 |
| 089 | Medical Ethics Committee of Shanxi Bethune Hospital | YXLL-2020-031 |
| 090 | Medical Ethics Committee of The First People's Hospital of Kunshan | 2020-01-005-H01 |
| 092 | Medical Ethics Committee of Shenzhen Longgang Central Hospital | 2020ECPJ022 |
| 095 | Clinical Research Ethics Committee of Weifang Second People's Hospital | YW2020-003-01 |
| 096 | Ethics Committee of Henan Provincial People's Hospital | (2020) Ethics Review No. (159) |

## Table S2. Asthma-related prior and concomitant medications in at least 0.2% of the patients

| ATC Text | Overall population  N=1528 (%) | Pediatric patients,  6 to <12 years  N=191 (%) |
| --- | --- | --- |
| Patients with any asthma-related prior medication | 780 (51.0) | 94 (49.2) |
| Drugs for obstructive airway diseases | 668 (43.7) | 86 (45.0) |
| Corticosteroids for systemic use | 182 (11.9) | 6 (3.1) |
| Antihistamines for systemic use | 153 (10.0) | 14 (7.3) |
| Cough and cold preparations | 99 (6.5) | 6 (3.1) |
| Unspecified herbal and traditional medicine | 68 (4.5) | 9 (4.7) |
| Antibacterials for systemic use | 65 (4.3) | 4 (2.1) |
| Nasal preparations | 34 (2.2) | 3 (1.6) |
| Blood substitutes and perfusion solutions | 7 (0.5) | 0 (0) |
| Allergens | 6 (0.4) | 0 (0) |
| Anesthetics | 5 (0.3) | 0 (0) |
| Antimycotics for systemic use | 5 (0.3) | 0 (0) |
| Drugs for acid related disorders | 4 (0.3) | 0 (0) |
| Mineral supplements | 4 (0.3) | 0 (0) |
|  |  |  |
| Patients with any asthma-related concomitant medication | 1478 (96.7) | 181 (94.8) |
| Drugs for obstructive airway diseases | 1463 (95.7) | 177 (92.7) |
| Antihistamines for systemic use | 361 (23.6) | 42 (22.0) |
| Corticosteroids for systemic use | 172 (11.3) | 6 (3.1) |
| Cough and cold preparations | 149 (9.8) | 8 (4.2) |
| Nasal preparations | 94 (6.2) | 18 (9.4) |
| Unspecified herbal and traditional medicine | 86 (5.6) | 8 (4.2) |
| Antibacterials for systemic use | 75 (4.9) | 3 (1.6) |
| Allergens | 22 (1.4) | 3 (1.6) |
| Blood substitutes and perfusion solutions | 13 (0.9) | 1 (0.5) |
| Drugs for acid related disorders | 13 (0.9) | 0 (0.0) |
| All other non-therapeutic products | 10 (0.7) | 0 (0.0) |
| Immunostimulants | 9 (0.6) | 0 (0.0) |
| Analgesics | 5 (0.3) | 0 (0.0) |
| Antimycotics for systemic use | 3 (0.2) | 0 (0.0) |

ATC, Anatomical Therapeutic Chemical (ATC) Classification System
